# Supplementary material for: Red Rice Bran Extract Alleviates High-Fat Diet-Induced Non-Alcoholic Fatty Liver Disease and Dyslipidemia in Mice
Source: MDPI journal article supplement (doi:10.3390/nu15010246), 2023-01-03
Supplement: s1 [file s1]

**Table S1.** TaqMan probe assay IDs.

| Gene name           | Assay IDs     |
|---------------------|---------------|
| ATGL                | Mm00503040_m1 |
| CD36                | Mm00432403_m1 |
| LPL                 | Mm00443451_m1 |
| LXR $\alpha$        | Mm00434764_m1 |
| SREBP-1c            | Mm00550338_m1 |
| CPT1A               | Mm00550442_m1 |
| SREBP-2             | Mm01306292_m1 |
| HMGCR               | Mm01282499_m1 |
| HL                  | Mm01171487_m1 |
| ApoA-I              | Mm00437569_m1 |
| NF- $\kappa$ B p65  | Mm00501346_m1 |
| iNOS                | Mm00440502_m1 |
| p47 <sup>phox</sup> | Mm00447921_m1 |
| SOD1                | Mm01344233_g1 |
| CAT                 | Mm00437992_m1 |
| Bax                 | Mm00432051_m1 |
| Bcl-2               | Mm00477631_m1 |
| GAPDH               | Mm99999915_g1 |

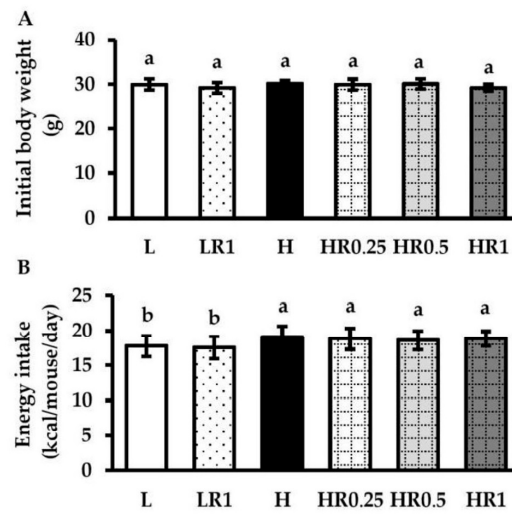

**Figure S1.** Effects of RRBE on initial body weight (A) and energy intake (B) in mice fed with experimental diet. Values are means  $\pm$  SD; 6 mice/group. Statistically significant difference at  $p < 0.05$  was analyzed using one-way ANOVA with Tukey's test and is indicated by different letters above error bars. L, LFD and distilled water co-treated group; LR1, LFD and high-dose (1 g/kg) RRBE co-treated group; H, HFD and distilled water co-treated group; HR0.25, HFD and low-dose (0.25 g/kg) RRBE co-treated group; HR0.5, HFD and middle-dose (0.5 g/kg) RRBE co-treated group; HR1, HFD and high-dose RRBE co-treated group.
